# Supplementary material for: T-Cell Death-Associated Gene 51 Is a Novel Negative Regulator of PPARγ That Inhibits PPARγ-RXRα Heterodimer Formation in Adipogenesis
Source: PubMed Central journal article supplement — Mol Cells. 2020 Dec 18;44(1):1–12. doi: 10.14348/molcells.2020.0143 (PMC7854182; doi:10.14348/molcells.2020.0143), 2020-12-18
Supplement: molce-44-001_Supple.pdf [file molce-44-001_Supple.pdf]

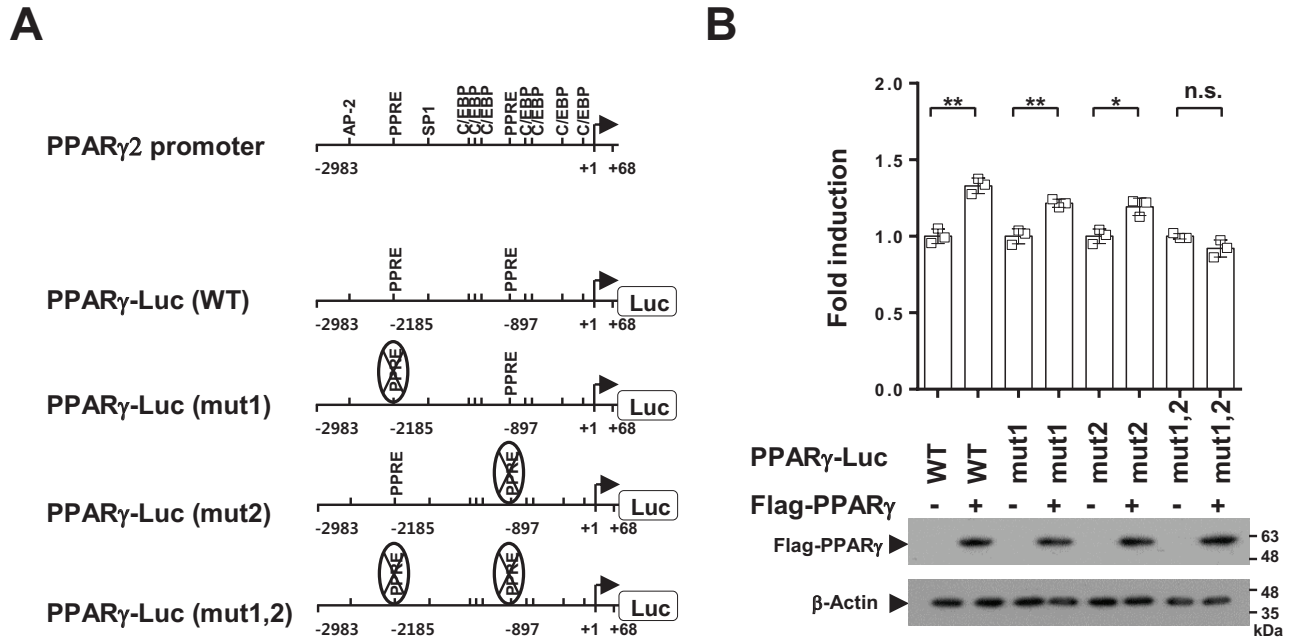

**Supplementary Fig. S1. Analysis of PPAR $\gamma$  promoter activity by PPAR $\gamma$  expression.** (A) Schematic diagram of the mutant PPAR $\gamma$ 2 promoter luciferase reporter. For the construction of luciferase reporter, the promoter fragments of PPAR $\gamma$ 2 (PPAR $\gamma$ -Luc, from nt -2,983 to +68) was amplified by PCR from the murine genomic DNA and subcloned into the pGL3-basic vector (Promega). The putative transcription factor binding sites are illustrated, and the nucleotide positions were numbered based on the transcriptional start site. PPRE, PPAR $\gamma$  responsive element; C/EBP, CCAAT/enhancer binding protein; SP1, specificity protein 1; AP-2, activator protein 2. (B) Analysis of the putative PPRE elements on the PPAR $\gamma$ 2 promoter. Two putative PPRE consensus sequences were present at nt -2,185 (5'-aTTtctAaggTca-3') and nt -897 (5'-aggGcaAaggCct-3'). The putative PPRE consensus sequences were mutated by site-directed mutagenesis (mut1: 5'-cTTcacAtaagag-3' and mut2: 5'-cttGagAtaaCag-3'). Reporter plasmids (PPAR $\gamma$ -Luc [0.1  $\mu$ g] and pcDNA3.1/His/LacZ [0.1  $\mu$ g]) were cotransfected with epitope-tagged expression plasmids (Flag-PPAR $\gamma$  [0.5  $\mu$ g]) into 293T cells. The expression of transfected plasmids was analyzed by immunoblotting against anti-epitope antibodies.  $\beta$ -Actin was used as the loading control. \* $P$  < 0.05; \*\* $P$  < 0.01; n.s., not significant.

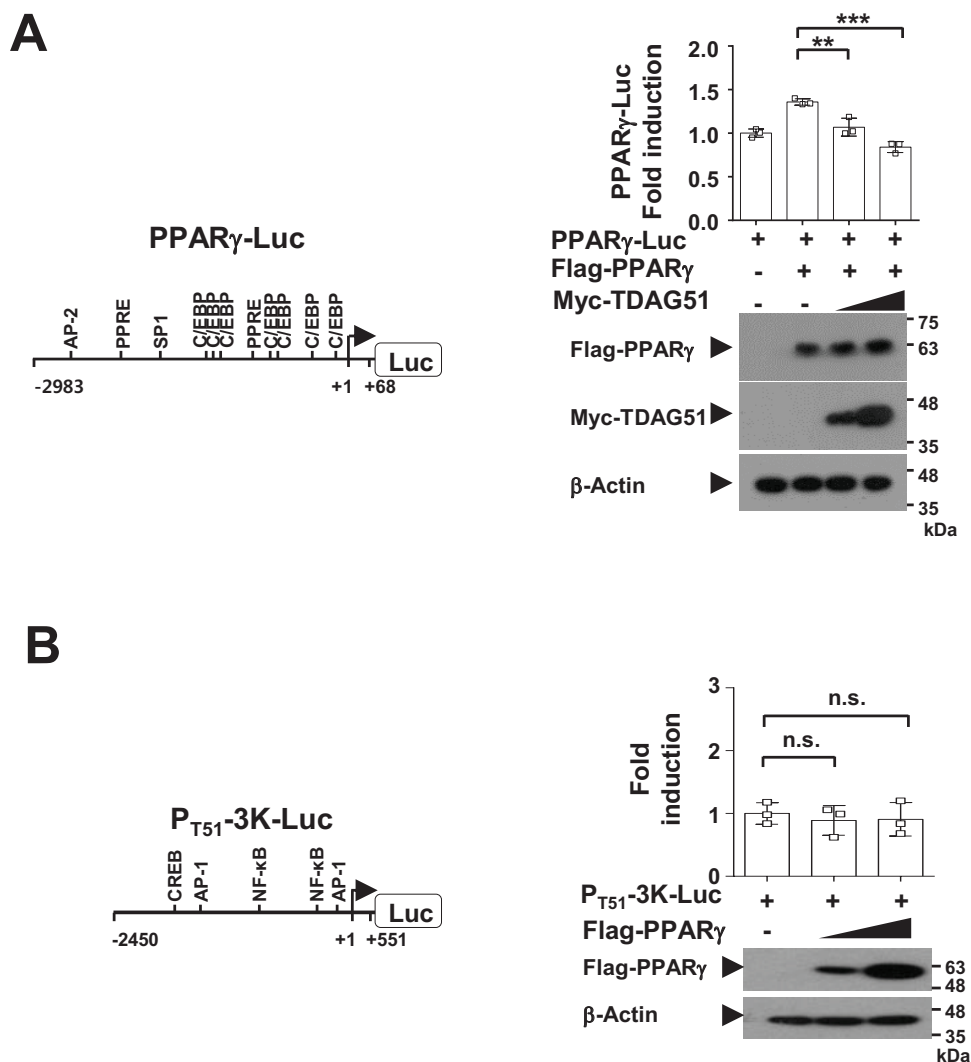

**Supplementary Fig. S2. Analysis of promoter activity by PPAR $\gamma$  or TDAG51 expression.** (A) Inhibition of PPAR $\gamma$ -induced transcriptional activation by TDAG51. (Left panel) Schematic diagram of the luciferase reporter of the PPAR $\gamma$ 2 promoter (PPAR $\gamma$ -Luc). The putative transcription factor binding sites are illustrated, and the nucleotide positions were numbered based on the transcriptional start site. PPRE, putative PPAR $\gamma$  responsive element; C/EBP, CCAAT/enhancer binding protein; SP1, specificity protein 1; AP-2, activator protein 2. (Right panel) The inhibitory effect of TDAG51 on PPAR $\gamma$ -induced PPAR $\gamma$ -Luc reporter activity. Reporter plasmids (PPAR $\gamma$ -Luc [0.1  $\mu$ g] and pcDNA3.1/His/LacZ [0.1  $\mu$ g]) were cotransfected with epitope-tagged expression plasmids (Flag-PPAR $\gamma$  [0.5  $\mu$ g] and/or Myc-TDAG51 [0.1 and 0.3  $\mu$ g]) into 293T cells. The expression of transfected plasmids was analyzed by immunoblotting against anti-epitope antibodies.  $\beta$ -Actin was used as the loading control. (B) Analysis of TDAG51 promoter activity by PPAR $\gamma$ . (Left panel) A schematic diagram of the luciferase reporter of the TDAG51 promoter (P<sub>T51</sub>-3K-Luc) is shown in the left panel. The putative transcription factor binding sites are illustrated, and the nucleotide positions were numbered based on the transcriptional start site. NF- $\kappa$ B, nuclear factor kappa B; CREB, cAMP response element-binding protein; AP-1, activator protein 1. (Right panel) The effect of PPAR $\gamma$  on TDAG51 promoter activity. Reporter plasmids (P<sub>T51</sub>-3K-Luc [0.1  $\mu$ g] and pcDNA3.1/His/LacZ [0.1  $\mu$ g]) were cotransfected with Flag-tagged PPAR $\gamma$  expression plasmids (Flag-PPAR $\gamma$  [0.1 and 0.3  $\mu$ g]) into 293T cells. The expression of transfected plasmids was analyzed by immunoblotting against anti-Flag antibody. \*\* $P$  < 0.01; \*\*\* $P$  < 0.001; n.s., not significant.
